# Supplementary material for: Calcium-Polyphosphate Submicroparticles (CaPP) Improvement Effect of the Experimental Bleaching Gels’ Chemical and Cellular-Viability Properties
Source: MDPI journal article supplement (doi:10.3390/gels9010042), 2023-01-04
Supplement: s1 [file s1]

## Article

# Calcium-Polyphosphate Submicroparticles (CaPP) Improvement Effect of the Experimental Bleaching Gels' Chemical and Cellular-Viability Properties

Mariángela Ivette Guanipa Ortiz <sup>1</sup>, Juliana Jarussi dos Santos <sup>2</sup>, Jonny Burga Sánchez <sup>3</sup>,  
Ubirajara Pereira Rodrigues-Filho <sup>2</sup>, Flávio Henrique Baggio Aguiar <sup>1</sup>, Klaus Rischka <sup>1,4,\*</sup>,  
and Débora Alves Nunes Leite Lima <sup>1</sup>

<sup>1</sup> Department of Restorative Dentistry, Piracicaba Dental School, University of Campinas—UNICAMP, Piracicaba 13414-903, SP, Brazil

<sup>2</sup> Group of Chemistry of Hybrid and Inorganic Materials (GQMATHI), São Carlos Institute of Chemistry, University of São Paulo (USP), São Carlos 13563-120, SP, Brazil

<sup>3</sup> Department of Physiological Science, Piracicaba Dental School, University of Campinas—UNICAMP, Piracicaba 13414-903, SP, Brazil

<sup>4</sup> Fraunhofer Institute for Manufacturing Technology and Advanced Materials IFAM, Wiener Straße 12, 28359 Bremen, Germany

\* Correspondence: klaus.rischka@ifam.fraunhofer.de

## Supplementary Materials

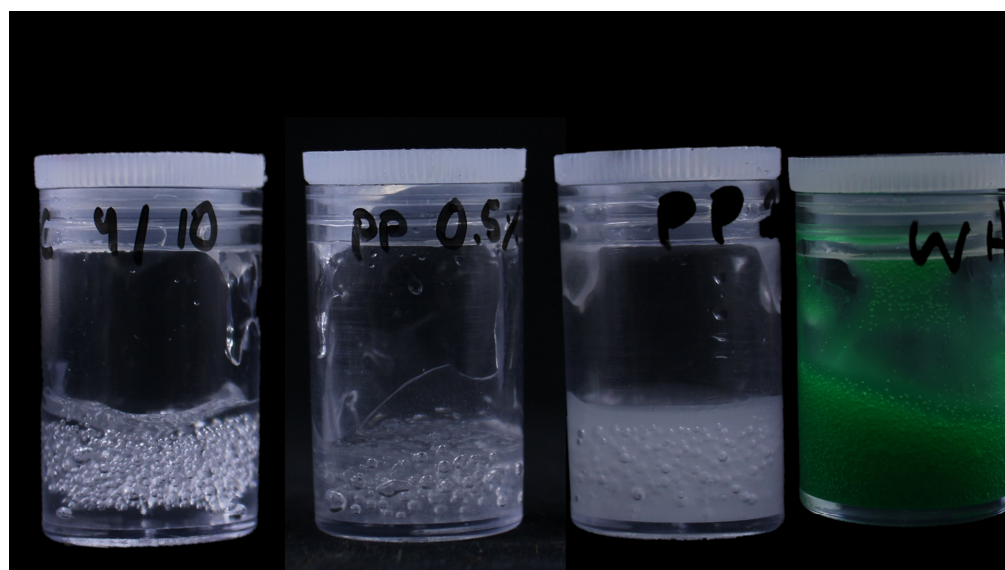

**Figure S1.** Bleaching gels appearance after manipulation from left to right: Experimental; 0.5% CaPP; 1.5% CaPP; Commercial.
